# Supplementary material for: Chromatographic Assessment of Organic Compounds Using Carbon Nanotubes: The Relationship between Affinity and Dispersibility
Source: MDPI journal article supplement (doi:10.3390/nano14100824), 2024-05-08
Supplement: s1 [file s1]

# Supplementary Materials

*Article*

## Chromatographic Assessment of Organic Compounds Using Carbon Nanotubes: The Relationship between Affinity and Dispersibility

Taiyo Shimizu <sup>1</sup>, Ryoichi Kishi <sup>1,\*</sup>, Atsushi Hirano <sup>2</sup>, Ken Kokubo <sup>1</sup> and Kenji Hata <sup>1</sup>

<sup>1</sup> Nano Carbon Device Research Center, National Institute of Advanced Industrial Science and Technology (AIST), AIST Tsukuba Central 5, 1-1-1 Higashi, Tsukuba 305-8565, Ibaraki, Japan

<sup>2</sup> Nanomaterials Research Institute, National Institute of Advanced Industrial Science and Technology (AIST), AIST Tsukuba Central 5, 1-1-1 Higashi, Tsukuba 305-8565, Ibaraki, Japan

\* Correspondence: r-kishi@aist.go.jp

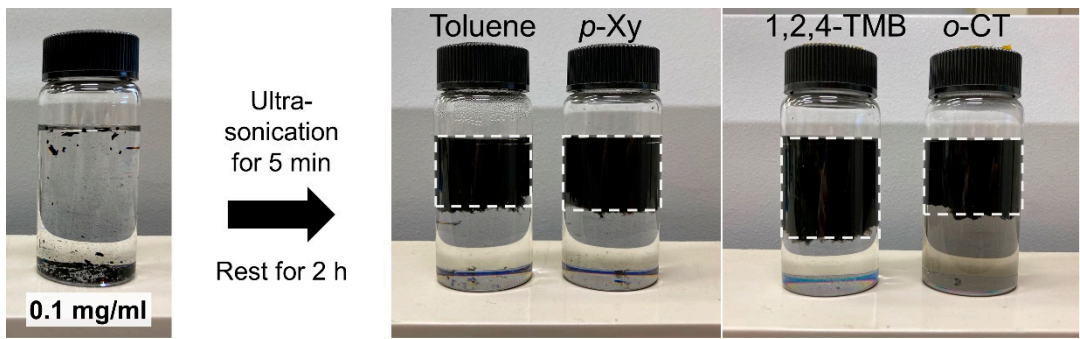

**Figure S1** Appearance of SWCNT dispersions for 4 kinds of solvent dispersed via ultrasonication.

SWCNT dispersions via ultrasonication shown in Figure S1 were obtained by following procedure:

SWCNTs of 4 mg were dried under vacuum for 3 h at 180 °C, and then dispersing solvent of 40 mL was added to them and dispersed by an ultrasonic homogenizer LUH300 (Yamato) at 60 % power for 5 min.

The degree of dispersion was determined by dividing the height of the SWCNT agglomerations by the height of dispersing solvent after 2 h from the dispersion process.

**Table S1** The dispersibility of SWCNTs in 4 kinds of solvents dispersed via ultrasonication.

|                                                              | Toluene | <i>p</i> -Xylene<br>( <i>p</i> -Xy) | 1,2,4-trimethylbenzene<br>(1,2,4-TMB) | <i>o</i> -chlorotoluene<br>( <i>o</i> -CT) |
|--------------------------------------------------------------|---------|-------------------------------------|---------------------------------------|--------------------------------------------|
| CNT height percentage after ultrasonication <sup>1</sup> / % | 41      | 47                                  | 67                                    | 49                                         |

<sup>1</sup> CNT concentration: 0.1 mg/mL

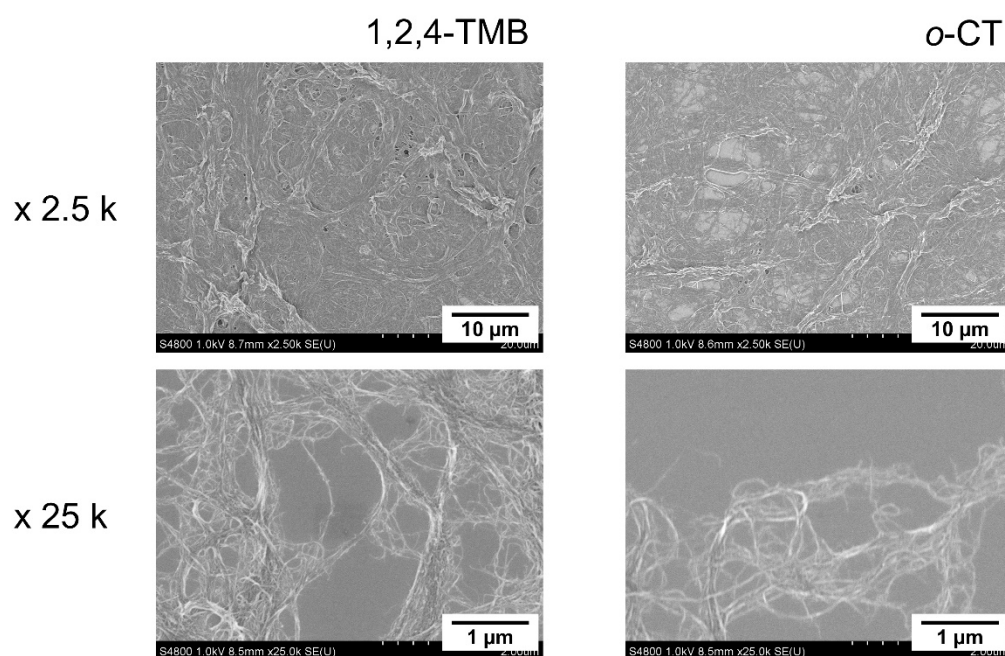

**Figure S2** Scanning electron microscope (SEM) images of SWCNTs on Si substrates deposited by spincoating the ultrasonicated CNT dispersions of 1,2,4-trimethylbenzene (1,2,4-TMB) and *o*-chlorotoluene (*o*-CT).

We performed scanning electron microscopy (SEM) observation on the SWCNTs dispersed in 1,2,4-trimethylbenzene (1,2,4-TMB) and *o*-chlorotoluene (*o*-CT) using a field emission scanning electron microscope S-4800 (Hitachi High-Tech). The SWCNTs were deposited on Si substrates by a spincoating process of SWCNT dispersions at 3,000 rpm for 30 s using a spincoater 1H-D7 (MIKASA). Obtained SEM images show no clear difference in morphologies such as bundle sizes, indicating the difficulty of the interpretation on the difference in dispersibility from nanoscale observations.
